# Supplementary material for: Sphingolipid Degradation in Leishmania (Leishmania) amazonensis
Source: PLoS Negl Trop Dis. 2012 Dec 20;6(12):e1944. doi: 10.1371/journal.pntd.0001944 (PMC3527339; doi:10.1371/journal.pntd.0001944)
Supplement: Figure S1 — Sequence alignment of L. amazonensis ISCL (LaISCL) and L. major ISCL (LmISCL). Alignment was done using the NCBI BLASTp program. Non-identical amino acids are shown in red. The underlined sequence indicates the P-loop motif. Amino acids 241–256 of LmISCL (boxed area) represent the epitope recognized by the anti-LmISCL peptide antibody. The braces represent predicted transmembrane helices. Asterisks mark amino acids that are essential for catalysis based on a recent study of LmISCL [10]. (PDF) [file pntd.0001944.s001.pdf]

LaISCL 1 MSHVSTFAADELPIRVL<sup>S</sup>FNLWGIFNS<sup>K</sup>MREARMK<sup>A</sup>FATKIEHYDVILLQEQFS<sup>A</sup>EDFDL  
LmISCL 1 MSH<sup>A</sup>STFAAGELPIRVL<sup>T</sup>FNLWGIFNS<sup>R</sup>MREARMK<sup>V</sup>FATKIEHYDVILLQEQFS<sup>V</sup>EDFDL

LaISCL 61 IFQ<sup>H</sup>ASPVVQRTYTFRRFCSSFYGSGCAVISRYPI<sup>C</sup>QAFFHTFPLQGCP<sup>E</sup>MLHG<sup>DFFAN</sup>  
LmISCL 61 IFQ<sup>N</sup>ASPVVQRTYTFRRFCSSFYGSGCAVISRYPI<sup>S</sup>QAFFHTFPLQGY<sup>P</sup>EMVLHG<sup>DFFAN</sup>

LaISCL 121 KGAAMVRVMVPVTM<sup>K</sup>DGSAAKAQ-VTLYTT<sup>H</sup>LVAVYEKVSQ<sup>L</sup>SSW<sup>K</sup>RERYLPFRISQAIS  
LmISCL 121 KGAAMVRVMVPVTM<sup>A</sup>DGGAAKAQ<sup>E</sup>VTLYTT<sup>H</sup>LVAVYEKVSQ<sup>L</sup>SSW<sup>R</sup>RERYLPFRISQAIS

LaISCL 180 FADFIVSTSRPTDRIIIGG<sup>D</sup>FNCSQRSLEVQ<sup>M</sup>MLILLK<sup>R</sup>CGY<sup>N</sup>MHSVLPPPRALRDAAT<sup>V</sup>  
LmISCL 181 FADFIVSTSRPTDPIIIGG<sup>D</sup>FNCSQRSLEVQ<sup>M</sup>MLILLK<sup>R</sup>YGY<sup>D</sup>MHSVLPPPRALRDAAA

LaISCL 240 GQECDDVQ<sup>R</sup>FFTYSD<sup>R</sup>N<sup>A</sup>FN<sup>S</sup>SMKTSYFKLLKLEADIPSQIDH<sup>I</sup>FFSRPAFAL<sup>R</sup>QFADCPD  
LmISCL 241 EQE<sup>R</sup>EVGQ<sup>R</sup>FFTYSD<sup>R</sup>N<sup>T</sup>FN<sup>S</sup>SMKTSYFKLLKLEADIPSQIDH<sup>M</sup>FFSRPAFAL<sup>L</sup>QFADCPD

LaISCL 300 VAEGYPC<sup>T</sup>L<sup>R</sup>DAPNGLVVFTK<sup>S</sup>EVYVPPHS<sup>T</sup>WYGS<sup>L</sup>WHQL<sup>L</sup>TAK<sup>R</sup>M<sup>P</sup>RGANATGQLAK<sup>S</sup>G  
LmISCL 301 VADGYPC<sup>V</sup>L<sup>Q</sup>DAPNGLVVFTK<sup>N</sup>EV<sup>H</sup>VPPHS<sup>A</sup>WYGS<sup>L</sup>WHQL<sup>F</sup>SGK<sup>R</sup>V<sup>P</sup>RGANATGQLAK<sup>L</sup>R

LaISCL 360 SKTAL<sup>S</sup>TEE<sup>Q</sup>SADDAAHYYP<sup>I</sup>S<sup>D</sup>HFGVAALLGMRVE<sup>T</sup>VG-----SSAETG<sup>D</sup>AALALT  
LmISCL 361 CKAAS<sup>S</sup>TEG<sup>Q</sup>SADDAAHYYP<sup>M</sup>S<sup>D</sup>HFGVAALLGMRVE<sup>K</sup>VD<sup>S</sup>TTAMIC<sup>S</sup>SAGTGGTAALALT

LaISCL 413 PDEARAVQTV<sup>A</sup>D<sup>F</sup>LEDYV<sup>C</sup>KLRSQAKT<sup>T</sup>RYMAV<sup>L</sup>SVLLVA<sup>A</sup>NIWVLR<sup>Q</sup>LSAKEE<sup>V</sup>RSAAV  
LmISCL 421 P<sup>E</sup>E<sup>E</sup>ARAVQTV<sup>V</sup>A<sup>F</sup>LEDYV<sup>R</sup>KLRSQAKT<sup>A</sup>RYMAV<sup>F</sup>S<sup>L</sup>LLVAT<sup>N</sup>IWVLR<sup>R</sup>LSAKEE<sup>A</sup>RSAAV

LaISCL 473 LE<sup>H</sup>LYDMAAA<sup>T</sup>TRDTAK<sup>V</sup>VQ<sup>Q</sup>DKGLESIKHG<sup>F</sup>NVAKDWV<sup>S</sup>NQAHLTL<sup>R</sup>IVN<sup>K</sup>VTGA----  
LmISCL 481 LE<sup>R</sup>IYDMAAA<sup>A</sup>TRDTAM<sup>V</sup>VQ<sup>P</sup>GKGLESIKHG<sup>F</sup>N<sup>T</sup>AKDWV<sup>N</sup>NQAHLTL<sup>H</sup>IV<sup>S</sup>K<sup>F</sup>TG<sup>G</sup>TPAP

LaISCL 529 GIDACDTPEGSKQPAANVADPSEPVPRTVPAST<sup>A</sup>ARTAKRATTT<sup>L</sup>EGDAAA<sup>F</sup>AAVRP<sup>D</sup>FR  
LmISCL 541 GINACDTPEGSKQPAANVADPSEPVPRTVPAST<sup>T</sup>ATTAKRATTT<sup>P</sup>EGDAAA----RP<sup>D</sup>FR

LaISCL 589 AIAEALT<sup>A</sup>RPLYAST<sup>T</sup>WVSSAFN<sup>M</sup>TA<sup>A</sup>VVGTVSFAIGVFQ<sup>R</sup>RAGNAN<sup>I</sup>LEE<sup>Q</sup>VHQLKKL  
LmISCL 597 AIAEALT<sup>V</sup>RPLYAS<sup>A</sup>WVSSAFN<sup>I</sup>TA<sup>A</sup>VVGTVSFAIGVFQ<sup>R</sup>RAGNAN<sup>V</sup>LEE<sup>Q</sup>AHQLKKL
