# Supplementary material for: Sphingolipid Degradation in Leishmania (Leishmania) amazonensis
Source: PLOS journal article supplement (doi:10.1371/journal.pntd.0001944), 2012-12-20

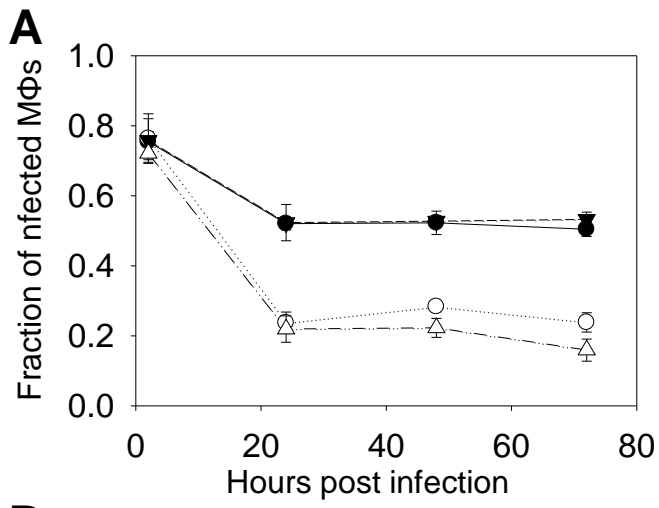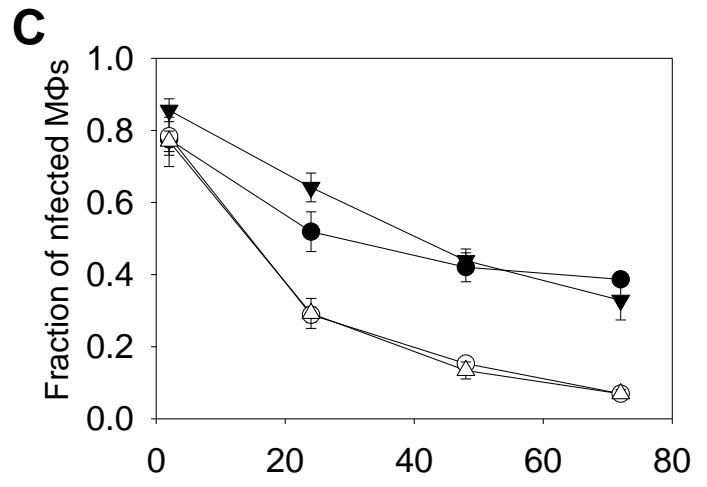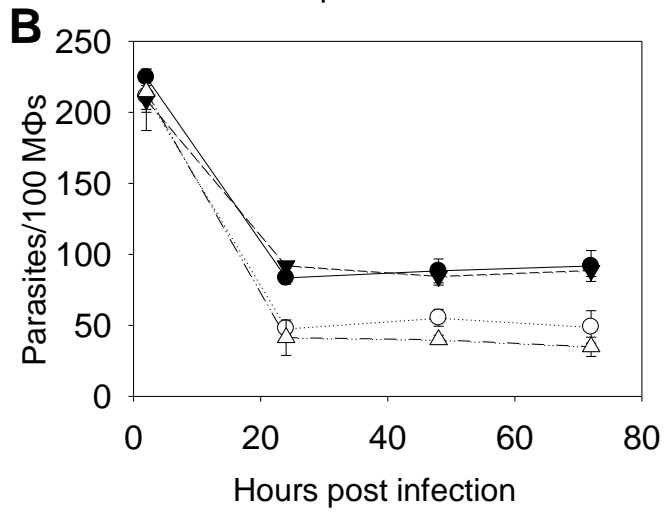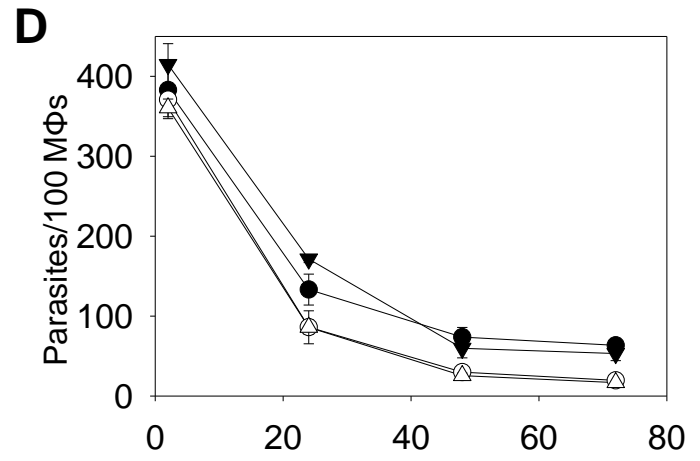

Supplement: S6 (10.1371/journal.pntd.0001944.s006) [file journal.pntd.0001944.s006]
